# Supplementary material for: Using benzoxazine chemistry and bio-based triblock copolymer to prepare functional porous polypeptide capable of efficient dye adsorption
Source: Royal Society of Chemistry journal article supplement (doi:10.1039/c8py00664d), 2018-01-01
Supplement: c8py00664d1.pdf [file c8py00664d1.pdf]

## Supporting Information

### Using Benzoxazine Chemistry and Bio-Based Triblock Copolymer to Prepare Functional Porous Polypeptide Capable of Efficient Dye Adsorption

**Cheng-Chang Tsai,<sup>a</sup> Zhihua Gan,<sup>b</sup> and Shiao-Wei Kuo<sup>a,c,\*</sup>**

<sup>a</sup>Department of Materials and Optoelectronic Science, National Sun Yat-Sen University, Kaohsiung 80424, Taiwan.

<sup>b</sup>State Key Laboratory of Organic-Inorganic Composites, College of Life Science and Technology, Beijing University of Chemical Technology, Beijing 100029, China.

<sup>c</sup>Department of Medicinal and Applied Chemistry, Kaohsiung Medical University, Kaohsiung, Taiwan.

E-mail: kuosw@faculty.nsysu.edu.tw

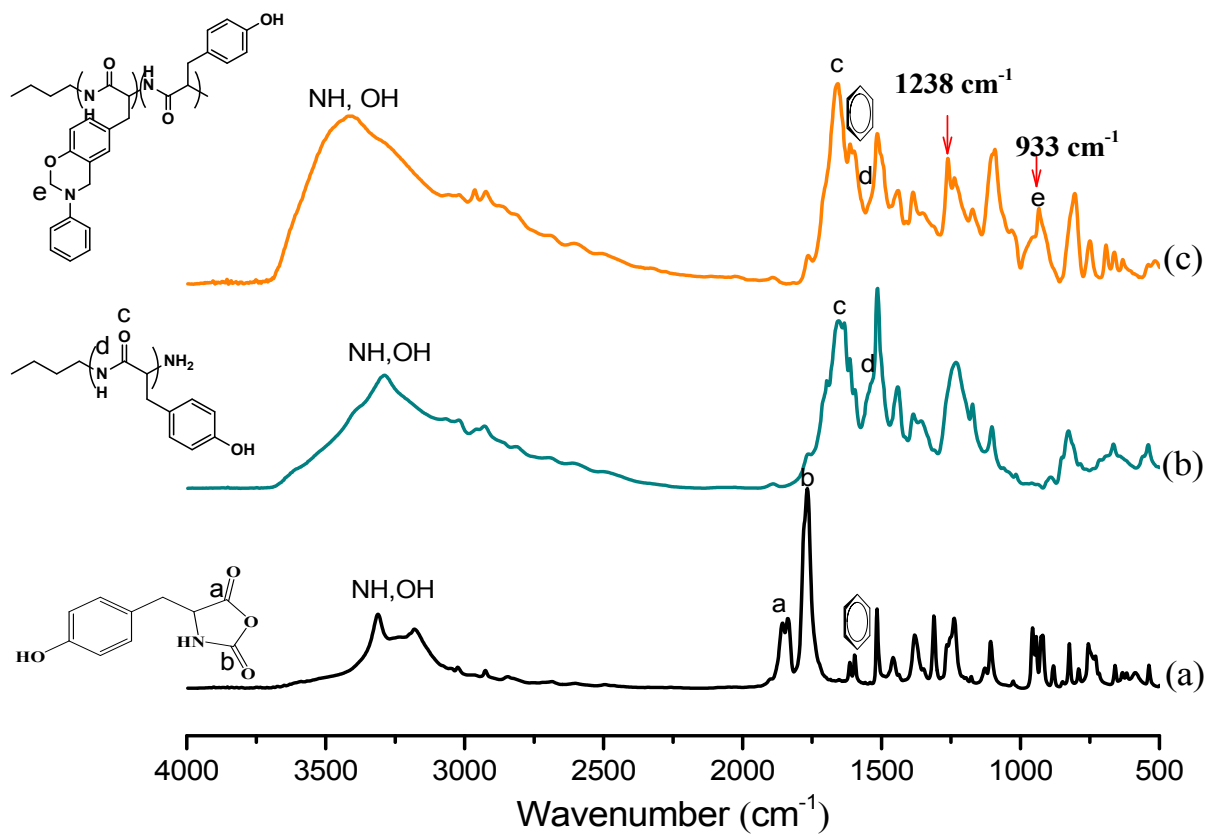

Figure S1: FTIR spectra of (a) the Tyr-NCA monomer, (b) the PTyr homopolymer, and (c) the PTyrBZ random copolymer.

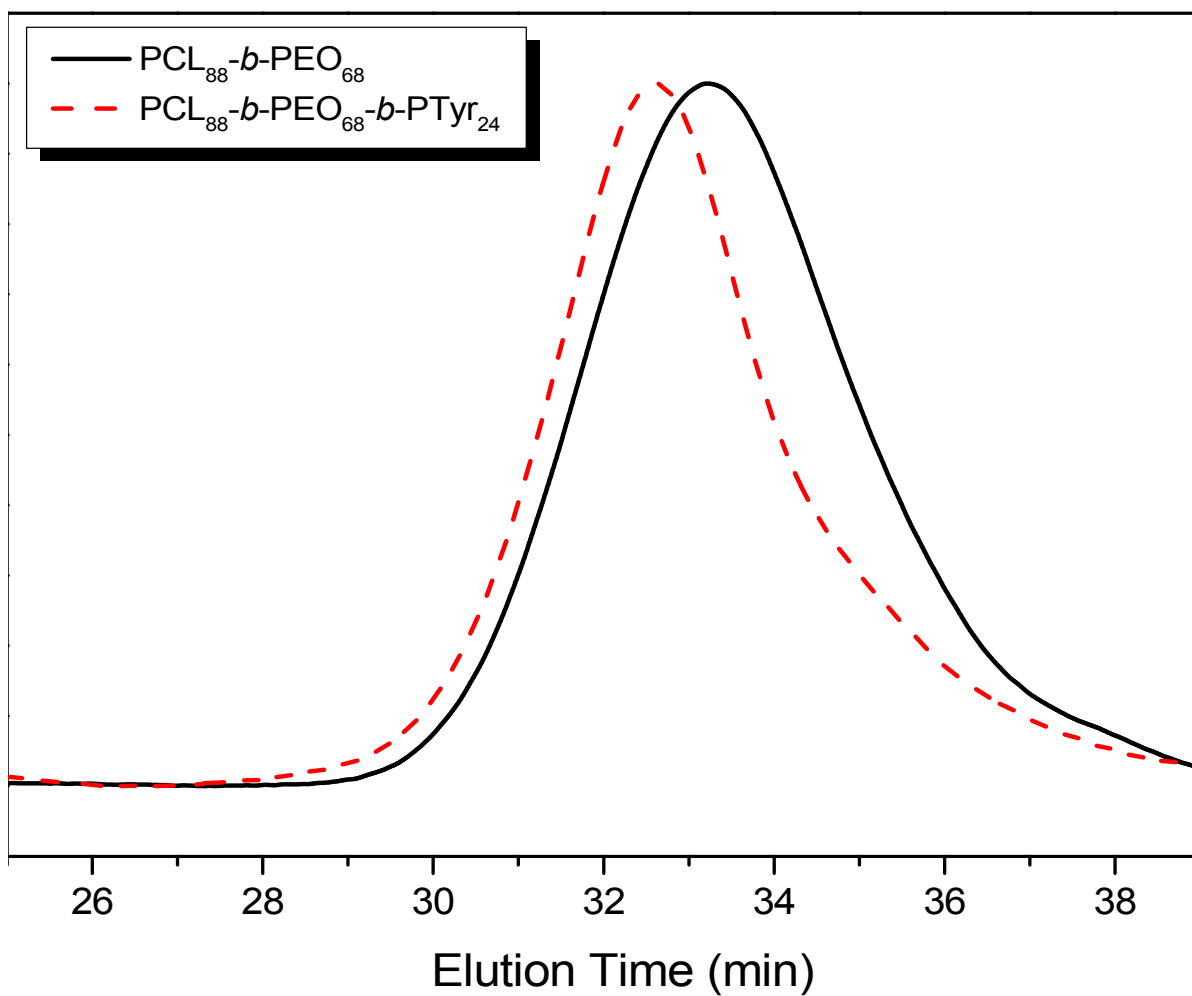

Figure S2: GPC analyses of (a)  $\text{PCL}\text{-}b\text{-PEO}\text{-NH}_2$  and (b)  $\text{PCL}\text{-}b\text{-PEO}\text{-}b\text{-PTyr}$ .

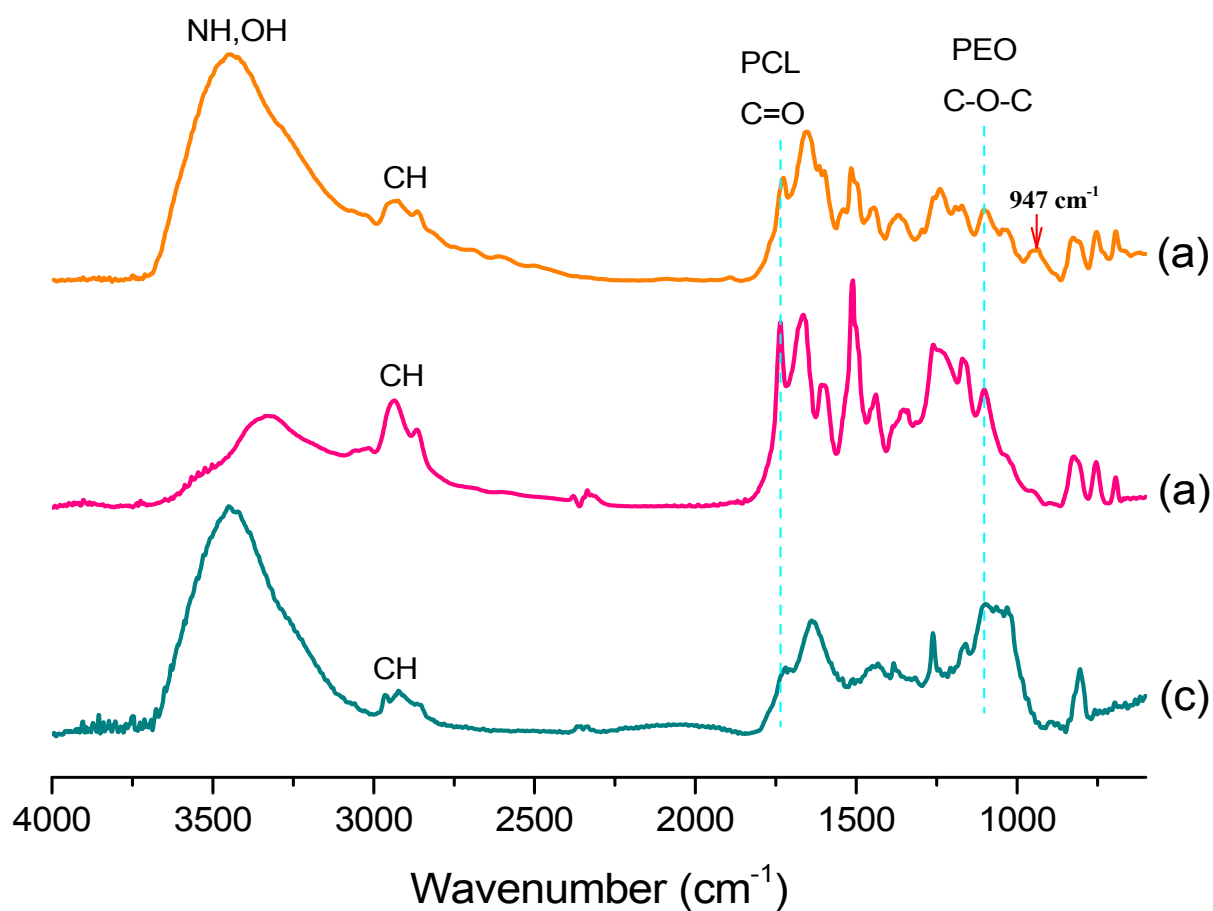

Figure S3: FTIR spectra, recorded at room temperature, of (a) PCL-*b*-PEO-*b*-PTyrBZ, (b) PCL-*b*-PEO-*b*-PTyrBZ after thermal curing at 240 °C, and (c) PCL-*b*-PEO-*b*-PTyrBZ after thermal calcination at 330 °C to form the porous PTyr.

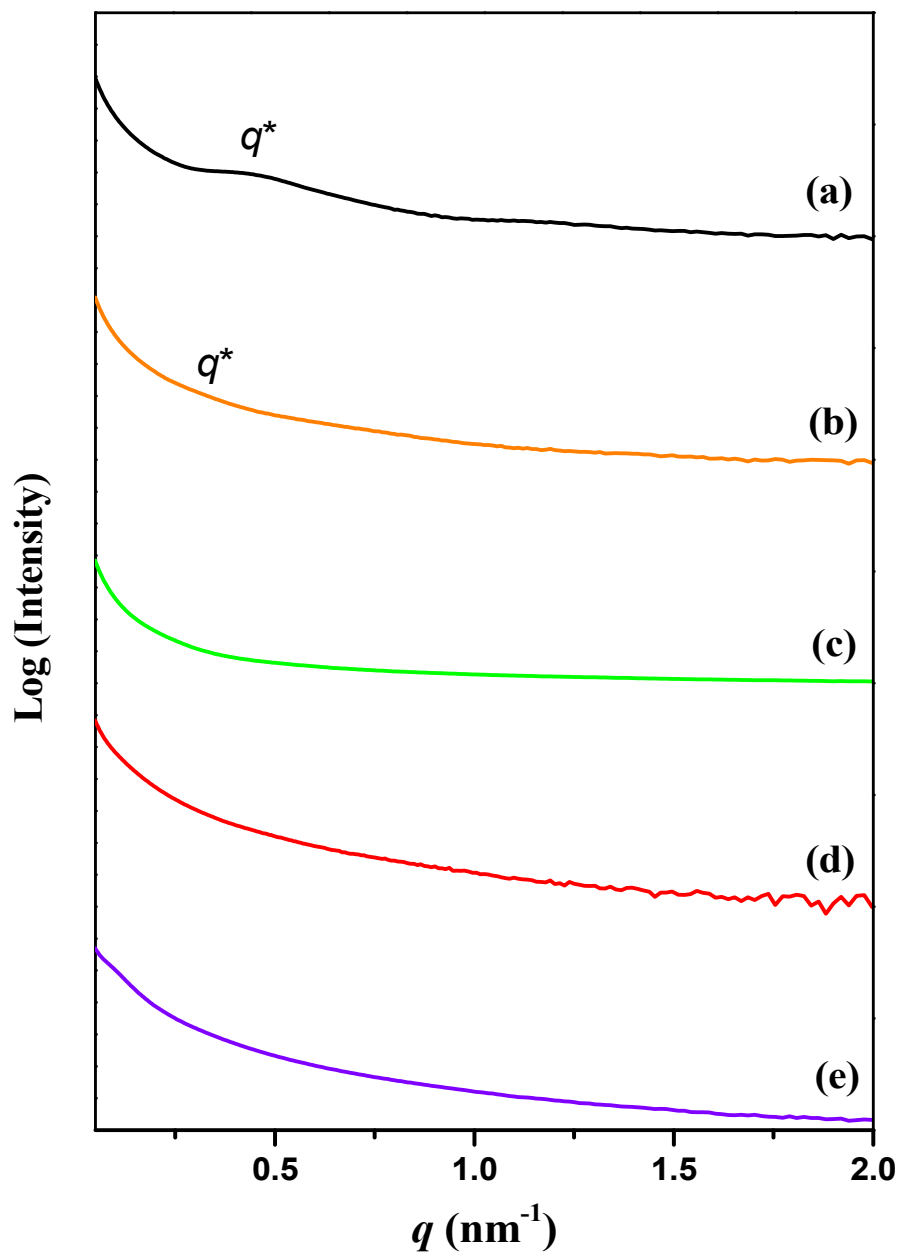

Figure S4: SAXS patterns, recorded at room temperature, of (a) PCL-*b*-PEO-NH<sub>2</sub>, (b) PCL-*b*-PEO-*b*-PTyr, (c) PCL-*b*-PEO-*b*-PTyrBZ, (d) PCL-*b*-PEO-*b*-PTyrBZ (after thermal curing at 240 °C), and (e) PCL-*b*-PEO-*b*-PTyrBZ (after thermal calcination at 330 °C).
